# Supplementary material for: Aggregation/dispersion-mediated peroxidase-like activity of MoS2quantum dots for colorimetric pyrophosphate detection
Source: Royal Society of Chemistry journal article supplement (doi:10.1039/c8cc09799b), 2019-01-01
Supplement: c8cc09799b1.pdf [file c8cc09799b1.pdf]

Electronic Supporting Information (ESI) for Chemical Communications  
This journal is © The Royal Society of Chemistry 2019

## Electronic Supporting Information

### **Aggregation/dispersion-mediated peroxidase-like activity of MoS<sub>2</sub> quantum dots for colorimetric pyrophosphate detection**

Wanqiang Xia,<sup>a,†</sup> Pu Zhang,<sup>b,†</sup> Wensheng Fu,<sup>a</sup> Lianzhe Hu<sup>a</sup> and Yi Wang<sup>a,\*</sup>

<sup>a</sup> *Chongqing Key Laboratory of Green Synthesis and Applications, and College of Chemistry,  
Chongqing Normal University, Chongqing 401331, China*

<sup>b</sup> *College of Pharmacy, Chongqing Medical University, Chongqing 400016, China*

\*Corresponding author. E-mail: [ywang@cqnu.edu.cn](mailto:ywang@cqnu.edu.cn)

† These authors contributed equally to this work.

## Experimental Details

### Chemicals and Materials

Ammonium tetrathiomoybdate ((NH<sub>4</sub>)<sub>2</sub>MoS<sub>4</sub>, ≥99.0%), glucose, Sodium acetate (CH<sub>3</sub>COONa, ≥99.0%), Acetic acid (CH<sub>3</sub>COOH, ≥99.5%), Ferric sulfate hydrate (Fe<sub>2</sub>(SO<sub>4</sub>)<sub>3</sub> · xH<sub>2</sub>O), hydrogen peroxide solution (H<sub>2</sub>O<sub>2</sub>, 30%) were all obtained from Kelong Chemical Co, Ltd. (Chengdu, China). Sodium pyrophosphate (Na<sub>4</sub>P<sub>2</sub>O<sub>7</sub> · 10H<sub>2</sub>O, ≥99.0%) was obtained from Beibei Chemical Co, Ltd. (Chongqing, China) and 3,3',5,5'-tetramethylbenzidine dihydrochloride (TMB) were purchased from Aladdin (Shanghai, China). Deionized (DI) water (18.2 MΩ·cm) was used throughout the experiment.

### Instrumentations

Transmission electron microscopy (TEM) images of the MoS<sub>2</sub> QDs were taken using a Tecnai G2 F20 transmission electron microscopy (USA) operated at 200kV. Atomic Force Microscopy (AFM) images of the MoS<sub>2</sub> QDs were measured by a Bruker Dimension Icon-AFM (USA). Dynamic light scattering (DLS) of MoS<sub>2</sub> QDs were taken using a Brookhaven Nano Brook omni (USA). The absorption spectra were measured using a UV-2550 UV-vis spectrophotometer (Shimadzu, Japan). X-ray photoelectron spectroscopy (XPS) data were obtained with an ESCALAB 250 X-ray photoelectron spectrometer (Thermo, USA). Fluorescence of the QDs was measured with an LS-55 fluorescence spectrometer (PerkinElmer, USA). A high-speed TGL-16M centrifuge (Hunan, China) was used in the purification of samples.

### Synthesis of MoS<sub>2</sub> Quantum dots

The MoS<sub>2</sub> Quantum dots were synthesized in one step by hydrothermal method with (NH<sub>4</sub>)<sub>2</sub>MoS<sub>4</sub> as the precursor. Typically, 0.05 g of (NH<sub>4</sub>)<sub>2</sub>MoS<sub>4</sub> was firstly dispersed in 10 ml of water. After ultrasound for 10 min, glucose was added into the solution as a reducing agent. Then, the mixture solution was transferred to a Teflon autoclave and allowed to react at 200 °C for 8 h. After being naturally cooled to room temperature, the mixture was centrifuged at 12000 rpm and the supernatant was collected for further characterizations and use.

### **Procedure for the detection of PPI**

In a standard procedure, an appropriate concentration of PPI solution was added to a mixed solution (total volume, 3 mL) containing 100  $\mu\text{L}$  MoS<sub>2</sub> QDs, 0.1 mmol/L TMB, 10 mmol/L H<sub>2</sub>O<sub>2</sub> and 10  $\mu\text{mol/L}$  Fe<sup>3+</sup> in acetate buffer (pH 4.0). After reacted for 20 min at room temperature, the final reaction solution was measured by a UV-vis spectrophotometer.

### **PPI assay in real water samples**

The water samples were pretreated by filtered to remove insoluble impurities before PPI assay. The determination was carried out by adding 400  $\mu\text{L}$  pretreated water sample into mixed solution (total volume, 3 mL) containing 100  $\mu\text{L}$  MoS<sub>2</sub> QDs, 0.1 mmol/L TMB, 10 mmol/L H<sub>2</sub>O<sub>2</sub> and 10  $\mu\text{mol/L}$  Fe<sup>3+</sup> in acetate buffer (pH 4.0). Then, the mixed solution was incubated for 20 min at room temperature. Finally, the solution was measured by a UV-vis spectrophotometer.

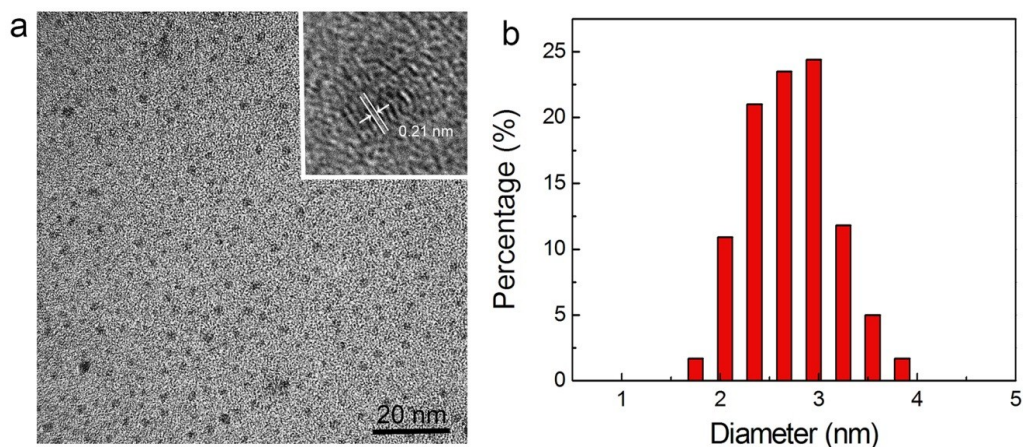

**Fig. S1** (a) TEM image of the MoS<sub>2</sub> QDs. Inset of (a) is the HRTEM image of an individual QD. (b) A histogram that shows the size distribution of the QDs.

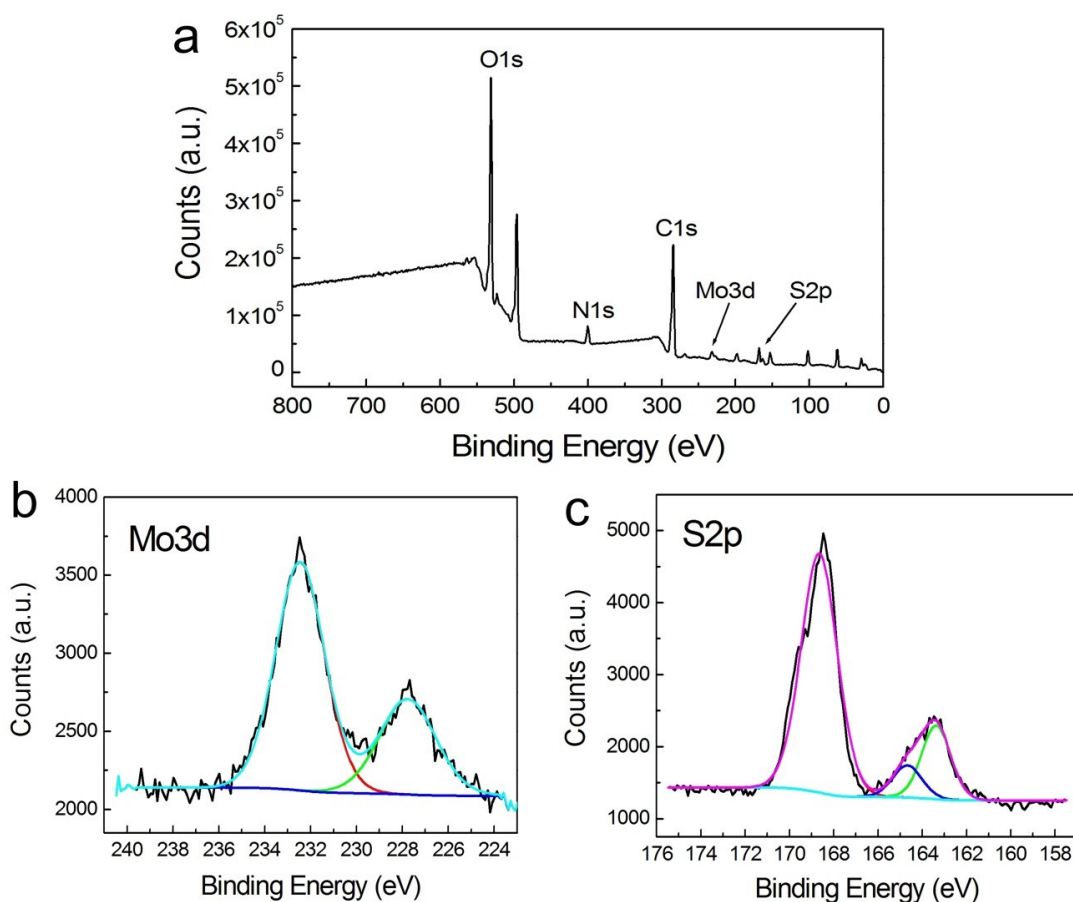

**Fig. S2** XPS characterization of the MoS<sub>2</sub> QDs: (a) XPS spectrum showing all the elements in the MoS<sub>2</sub> QDs; (b, c) high-resolution XPS spectra of Mo3d and S2p.

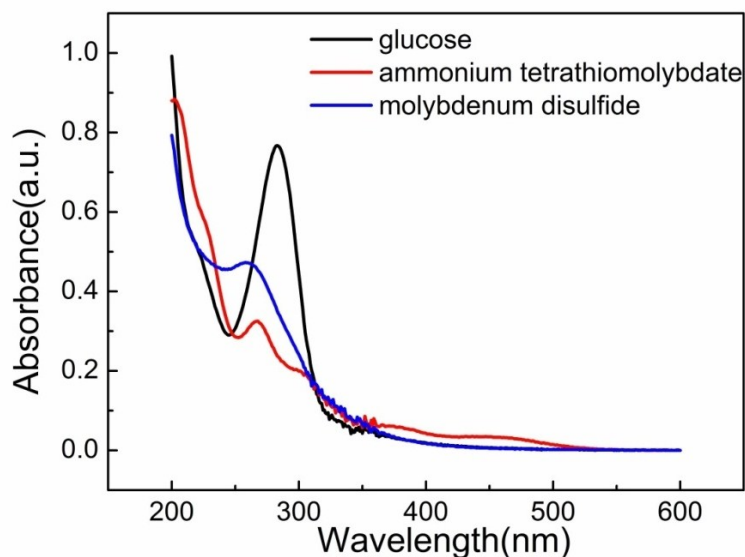

**Fig. S3** UV-vis absorption spectra of glucose (black line), ammonium tetrathiomolybdate (red line) and the MoS<sub>2</sub> QDs (blue line).

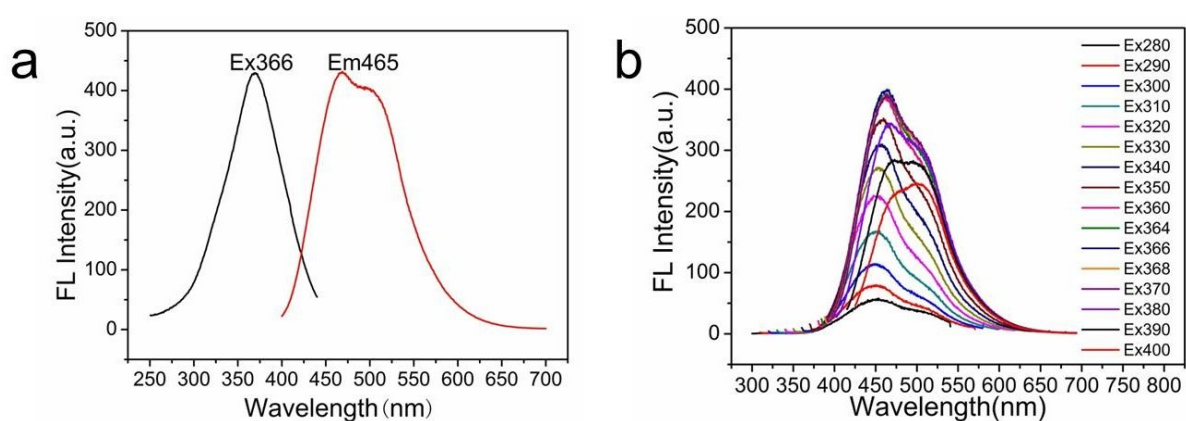

**Fig. S4** (a) Fluorescence excitation and emission spectra of the as-prepared MoS<sub>2</sub> QDs. (b) Fluorescence emission spectra of the MoS<sub>2</sub> QDs with different excitation wavelengths.

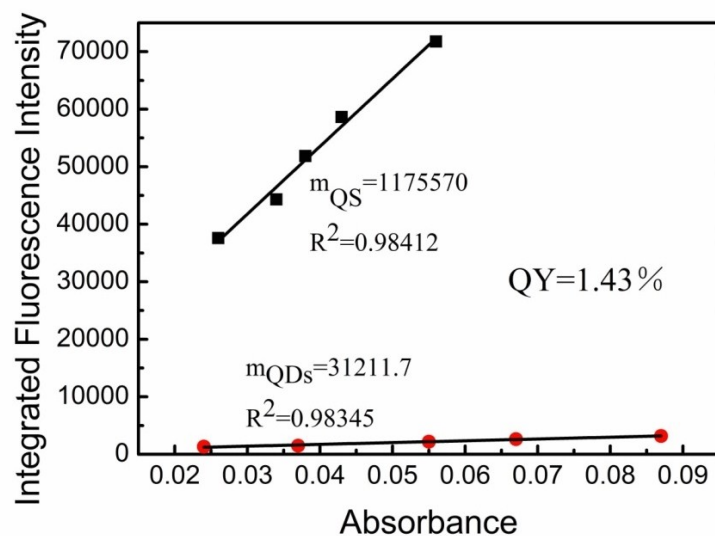

**Fig. S5** Measurement of fluorescence quantum yield (QY) of the MoS<sub>2</sub> QDs using quinine sulfate (QS) as a reference.

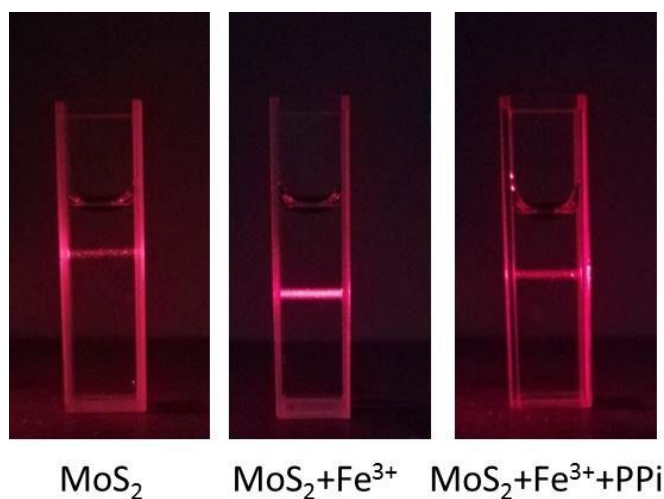

**Fig. S6** Digital photographs of the Tyndall effect of MoS<sub>2</sub> QDs (left), the mix of MoS<sub>2</sub> QDs and Fe<sup>3+</sup> (middle), and the mix of MoS<sub>2</sub> QDs, Fe<sup>3+</sup> and PPI (right). The concentration of added Fe<sup>3+</sup> and PPI were 1mM and 0.6 mM, respectively.

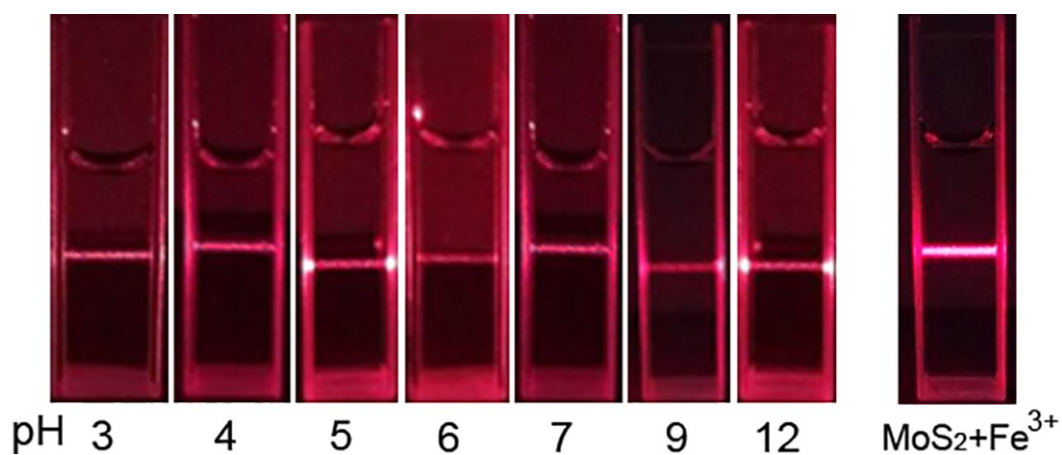

**Fig. S7** Digital photographs of the Tyndall effect of MoS<sub>2</sub> QDs under different pH value. The rightmost sample contains both MoS<sub>2</sub> QDs and Fe<sup>3+</sup>, which is used as a contrast.

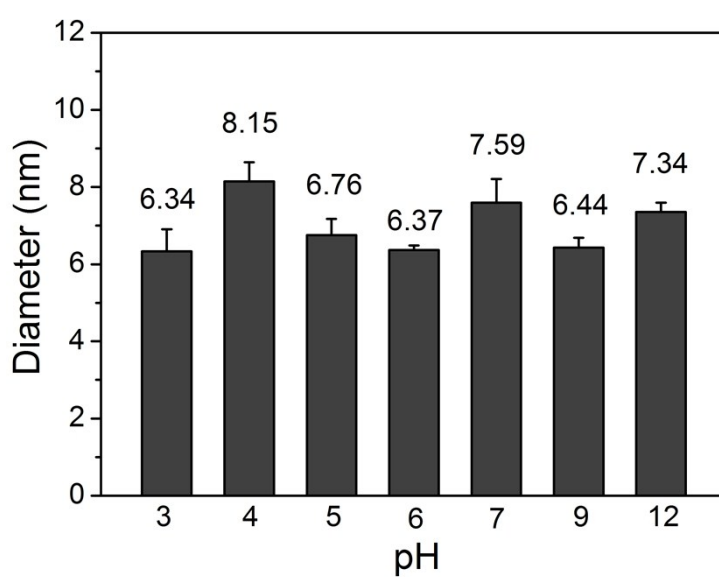

**Fig. S8** The diameter of MoS<sub>2</sub> QDs under different pH that measured by DLS.

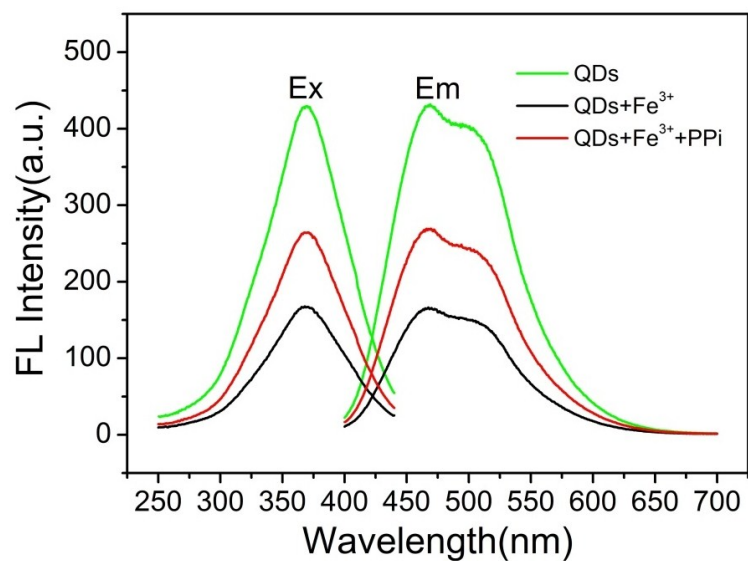

**Fig. S9** Fluorescence spectra of MoS<sub>2</sub> QDs, MoS<sub>2</sub> QDs + Fe<sup>3+</sup>, and MoS<sub>2</sub> QDs + Fe<sup>3+</sup> + PPI. The concentration of added Fe<sup>3+</sup> and PPI were 1mM and 0.6 mM, respectively.

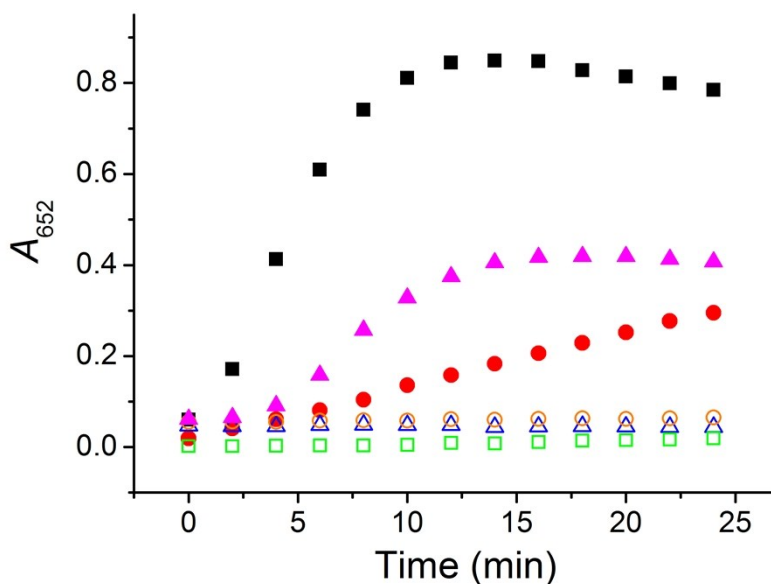

**Fig. S10** The kinetic curves of TMB-H<sub>2</sub>O<sub>2</sub> (□) and TMB-H<sub>2</sub>O<sub>2</sub> in the presence of PPI (Δ), MoS<sub>2</sub> QDs (○), Fe<sup>3+</sup> (●), MoS<sub>2</sub> QDs + Fe<sup>3+</sup> (■), and MoS<sub>2</sub> QDs + Fe<sup>3+</sup> + PPI (▲).



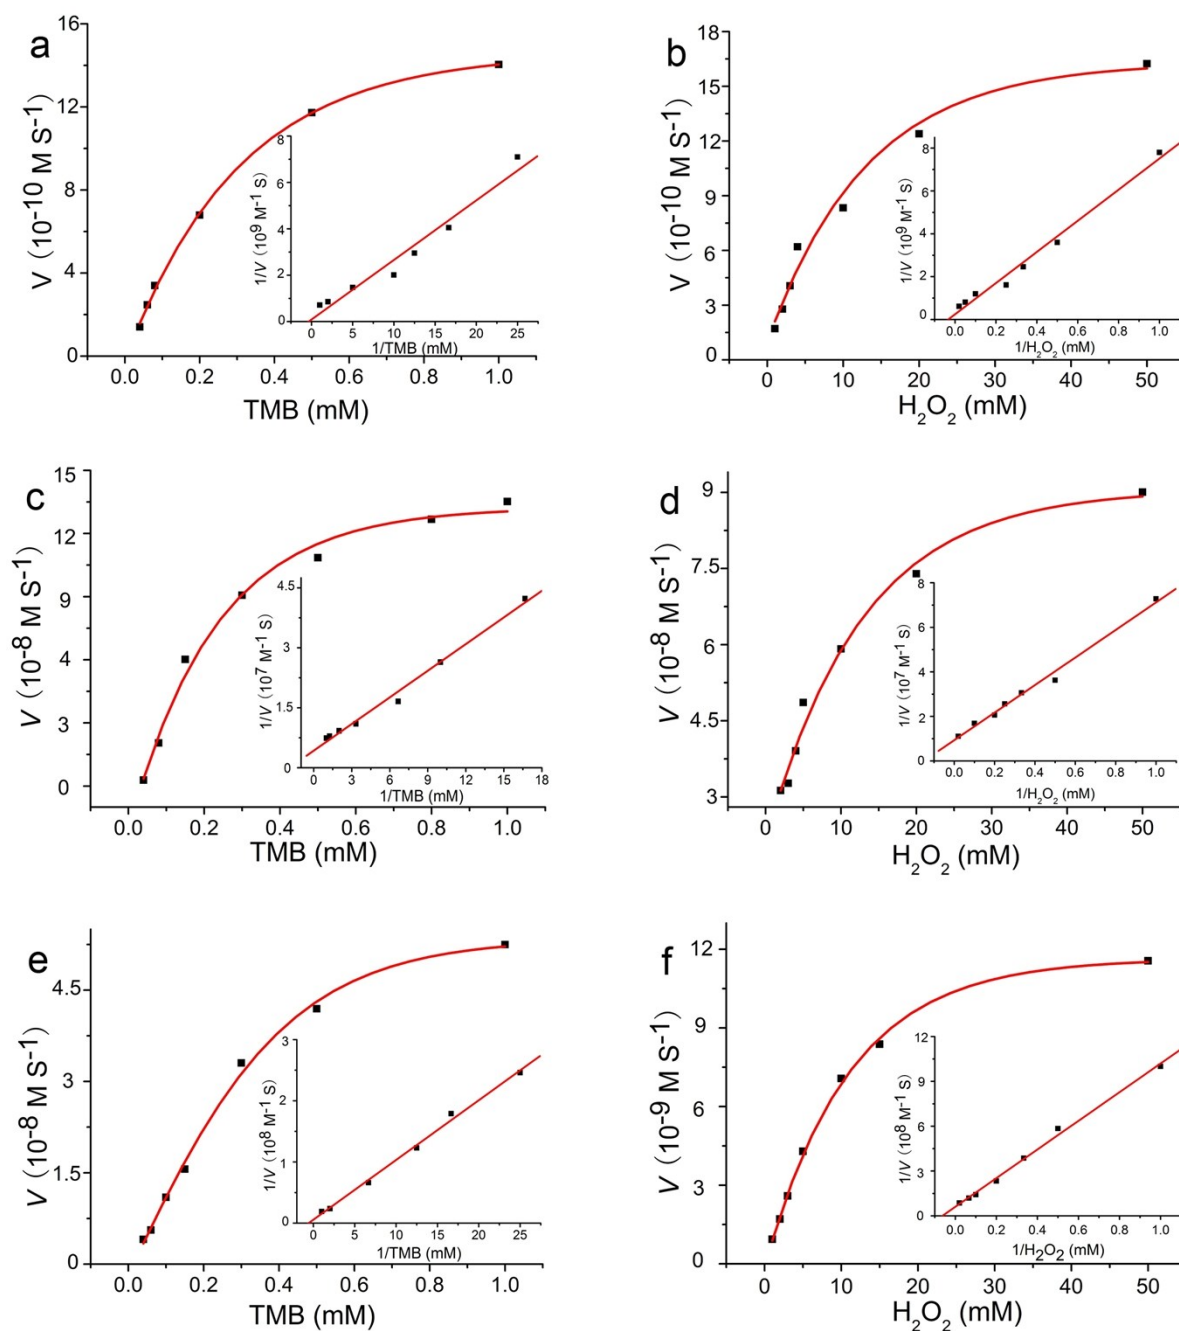

**Fig. S11** Steady-state kinetic assays of the MoS<sub>2</sub> QDs (a, b), MoS<sub>2</sub> QDs and Fe<sup>3+</sup> (c, d), MoS<sub>2</sub> QDs and Fe<sup>3+</sup> coexist with PPI (e, f) for the oxidation of TMB by H<sub>2</sub>O<sub>2</sub>. The kinetic data were obtained by varying one substrate concentrations while keeping the other substrate concentration constant (0.1 mM TMB or 10 mM H<sub>2</sub>O<sub>2</sub>). Insets are the Lineweaver-Burk plots of the double reciprocal of the Michaelis-Menten equations.

**Table S1** Comparison of the kinetic parameters of various catalytic systems toward the oxidation of TMB by H<sub>2</sub>O<sub>2</sub>.<sup>a</sup>

|                                           | Substrate                     | K <sub>m</sub> / mM | V <sub>max</sub> / M s <sup>-1</sup> | K <sub>cat</sub> / s <sup>-1</sup> | K <sub>cat</sub> / K <sub>m</sub><br>[s <sup>-1</sup> mM <sup>-1</sup> ] |
|-------------------------------------------|-------------------------------|---------------------|--------------------------------------|------------------------------------|--------------------------------------------------------------------------|
| MoS <sub>2</sub>                          | H <sub>2</sub> O <sub>2</sub> | 29.79               | 4.10×10 <sup>-9</sup>                | 0.06                               | 2.15×10 <sup>-3</sup>                                                    |
| MoS <sub>2</sub> + Fe <sup>3+</sup>       | H <sub>2</sub> O <sub>2</sub> | 6.64                | 1.07×10 <sup>-7</sup>                | 1.68                               | 2.52×10 <sup>-1</sup>                                                    |
| MoS <sub>2</sub> + Fe <sup>3+</sup> + PPI | H <sub>2</sub> O <sub>2</sub> | 15.85               | 1.65×10 <sup>-8</sup>                | 0.26                               | 1.63×10 <sup>-2</sup>                                                    |
| MoS <sub>2</sub>                          | TMB                           | 3.00                | 1.17×10 <sup>-8</sup>                | 0.18                               | 0.06                                                                     |
| MoS <sub>2</sub> + Fe <sup>3+</sup>       | TMB                           | 0.52                | 2.34×10 <sup>-7</sup>                | 3.65                               | 7.03                                                                     |
| MoS <sub>2</sub> + Fe <sup>3+</sup> + PPI | TMB                           | 1.71                | 1.75×10 <sup>-7</sup>                | 2.73                               | 1.60                                                                     |

<sup>a</sup> K<sub>m</sub> is the Michaelis-Menten constant, V<sub>max</sub> is the maximal reaction rate, K<sub>cat</sub> is the catalytic constant, K<sub>cat</sub> = V<sub>max</sub>/ [E], and [E] is the concentration of MoS<sub>2</sub> QDs.

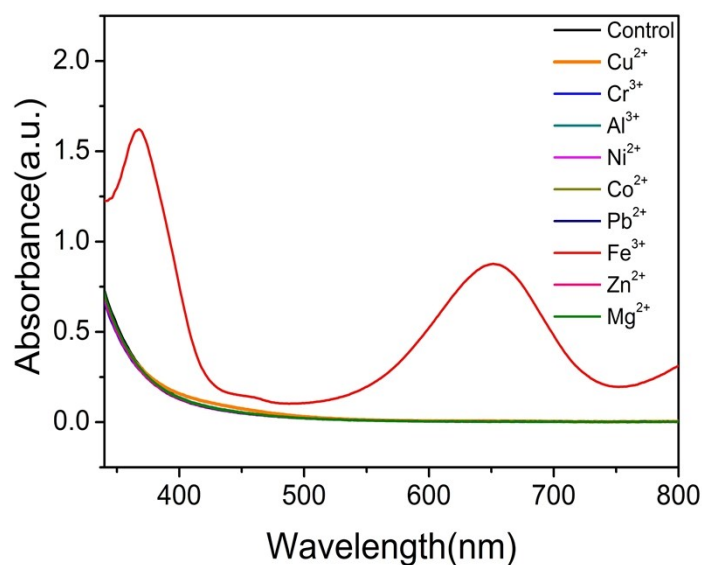

**Fig. S12** UV–vis spectra showing the peroxidase-like activity of MoS<sub>2</sub> QDs in the presence of different metal ions.

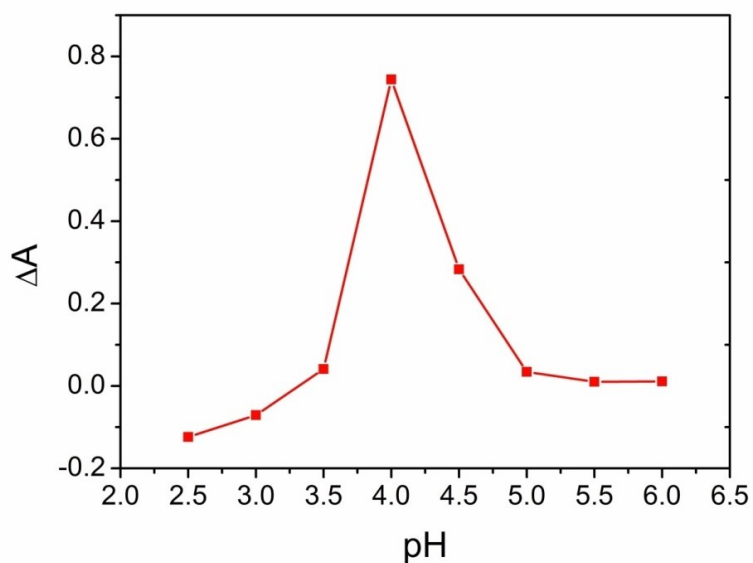

**Fig. S13** The absorbance change of the system at 652 nm in the absence and presence of PPI under different pH values.

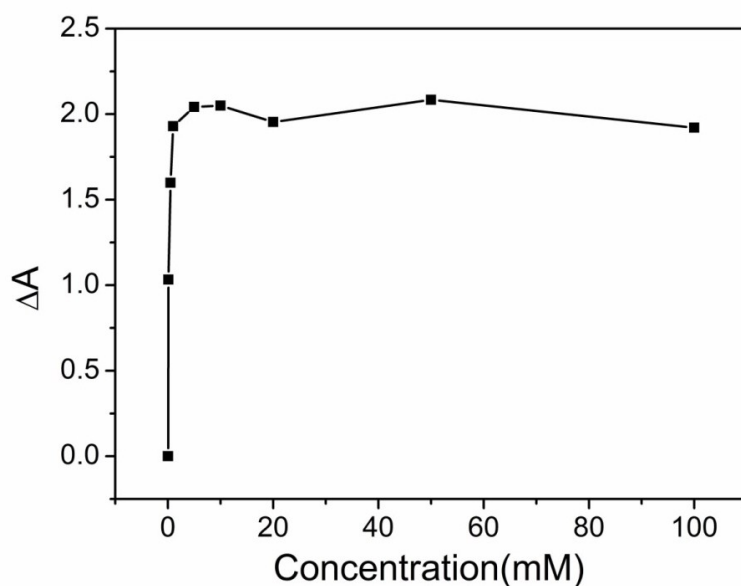

**Fig. S14** The absorbance change of the system at 652 nm in the absence and presence of PPI with the addition of different concentration of  $H_2O_2$ .

**Table S2** Detection of PPI in spiked real water samples.

| sample                  | PPI<br>spiked ( $\mu\text{M}$ ) | PPI<br>measured ( $\mu\text{M}$ ) | Recovery<br>(%) | RSD<br>(%,n=3) |
|-------------------------|---------------------------------|-----------------------------------|-----------------|----------------|
|                         | 3.00                            | 3.22                              | 107.3           | 2.86           |
| lake water <sup>a</sup> | 5.00                            | 4.74                              | 94.70           | 1.67           |
|                         | 7.00                            | 7.10                              | 101.4           | 0.25           |
|                         | 3.00                            | 3.22                              | 107.3           | 5.12           |
| tap water <sup>b</sup>  | 5.00                            | 5.45                              | 109.5           | 0.64           |
|                         | 7.00                            | 6.86                              | 97.99           | 0.13           |

<sup>a</sup> The sample was collected from the campus lake.

<sup>b</sup> The sample was collected from our lab.
